# Supplementary material for: A flexible and capsular polypyrrole nanotubular film-based pseudo-capacitive electrode with enhanced capacitive properties enabled by Au nanoparticle doping
Source: Royal Society of Chemistry journal article supplement (doi:10.1039/c9tc06574a), 2020-01-01
Supplement: c9tc06574a1.pdf [file c9tc06574a1.pdf]

## Supporting Information

### **Flexible and capsular polypyrrole nanotubular film based pseudo-capacitive electrode with enhanced capacitive properties enabled by Au nanoparticles doping**

Zhenyu Li,<sup>a,b</sup> Zhen Lei,<sup>a,b</sup> Yongbin Wang,<sup>b</sup> Yuanpeng Wu,<sup>\*a,b,c</sup> Meiling Guo,<sup>b</sup> Yi He,<sup>\*d</sup> Jingyu Chen,<sup>\*e</sup> and Jinfeng Wang<sup>\*e</sup>

<sup>a</sup> State Key Laboratory of Oil & Gas Reservoir Geology and Exploitation, Southwest Petroleum University, Chengdu, Sichuan 610500, China.

<sup>b</sup> School of New Energy and Materials, Southwest Petroleum University, Chengdu, Sichuan 610500, China.

<sup>c</sup> The Center of Functional Materials for Working Fluids of Oil and Gas Field, Southwest Petroleum University, Chengdu, Sichuan 610500, China

<sup>d</sup> College of Chemistry and Chemical Engineering, Southwest Petroleum University, Chengdu, P. R. China.

<sup>e</sup> Institute for Frontier Materials, Deakin University, Geelong/Melbourne, Australia

Email: [ypwu@swpu.edu.cn](mailto:ypwu@swpu.edu.cn), [chemheyi@swpu.edu.cn](mailto:chemheyi@swpu.edu.cn), [jingyu.chen@deakin.edu.cn](mailto:jingyu.chen@deakin.edu.cn) & [jinfeng.wang@deakin.edu.cn](mailto:jinfeng.wang@deakin.edu.cn)

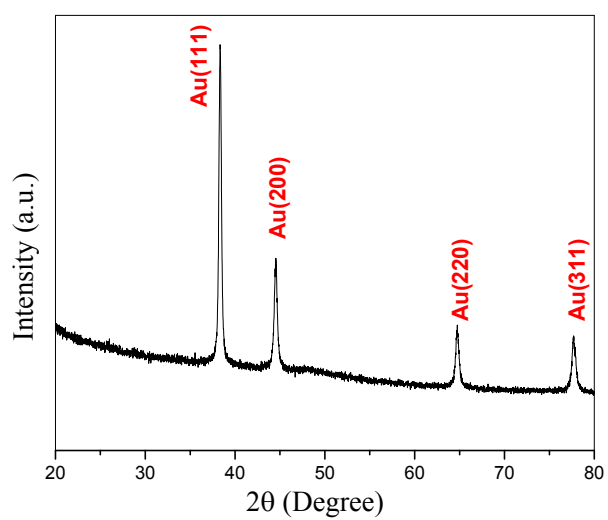

Figure S1. XRD of Au/PPy NM.
